CORRECTION

# Correction: CD8 T Cell Response Maturation Defined by Anentropic Specificity and Repertoire Depth Correlates with SIV $\Delta$ nef-induced Protection

The *PLOS Pathogens* Staff

## Notice of Republication

This article was republished on April 15, 2015 to correct an error where the Table 1 legend was included in the main text of the article. The publisher apologizes for these errors, which were introduced during the typesetting process. Please download this article again to view the correct version. The originally published, uncorrected article and the republished, corrected article are provided here for reference.

## Supporting Information

**S1 File. Originally published, uncorrected article.**

(PDF)

**S2 File. Republished, corrected article.**

(PDF)

## Reference

1. Adnan S, Colantonio AD, Yu Y, Gillis J, Wong FE, Becker EA, et al. (2015) CD8 T Cell Response Maturation Defined by Anentropic Specificity and Repertoire Depth Correlates with SIV $\Delta$ nef-induced Protection. *PLoS Pathog* 11(2): e1004633. doi:[10.1371/journal.ppat.1004633](https://doi.org/10.1371/journal.ppat.1004633) PMID: [25688559](https://pubmed.ncbi.nlm.nih.gov/25688559/)

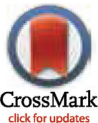

## OPEN ACCESS

**Citation:** The *PLOS Pathogens* Staff (2015) Correction: CD8 T Cell Response Maturation Defined by Anentropic Specificity and Repertoire Depth Correlates with SIV $\Delta$ nef-induced Protection. *PLoS Pathog* 11(5): e1004915. doi:[10.1371/journal.ppat.1004915](https://doi.org/10.1371/journal.ppat.1004915)

**Published:** May 14, 2015

**Copyright:** © 2015 The *PLOS Pathogens* Staff. This is an open access article distributed under the terms of the [Creative Commons Attribution License](https://creativecommons.org/licenses/by/4.0/), which permits unrestricted use, distribution, and reproduction in any medium, provided the original author and source are credited.
